# Supplementary material
Source: PubMed Central journal article supplement (PMC3216479)
Supplement: NIHMS303225-supplement-4.pdf [file NIHMS303225-supplement-4.pdf]

**a**

Glucose 16.7mmol/l

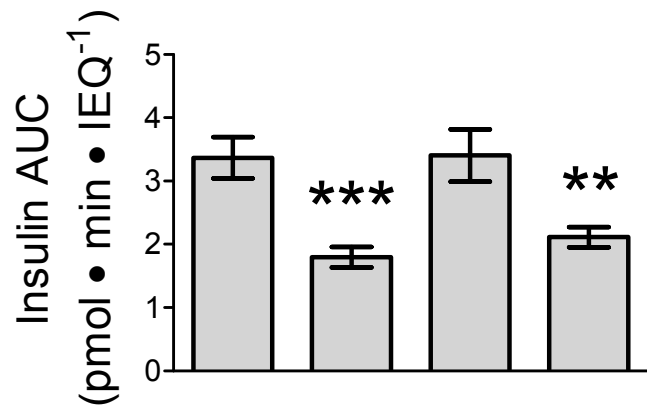

Aldo (1000nmol/l)

-

+

-

+

EPL (10 $\mu$ mol/l)

-

-

+

+

**c**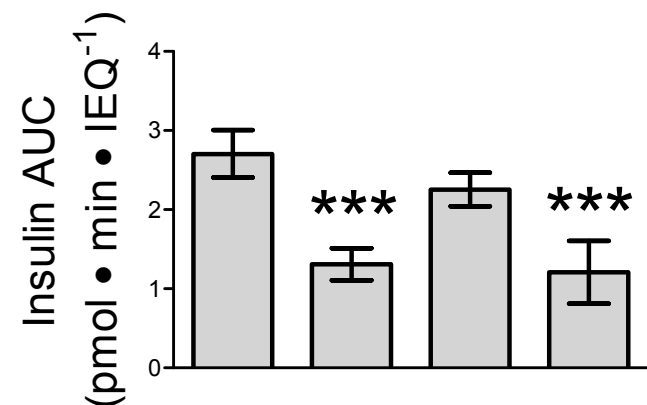

Aldo (1000nmol/l)

-

+

-

+

SPL (1 $\mu$ mol/l)

-

-

+

+

**b**Glucose 16.7mmol/l  
+ IBMX 100 $\mu$ mol/l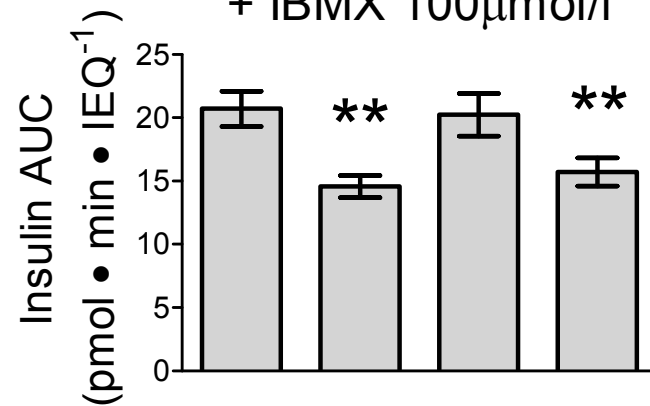

Aldo (1000nmol/l)

-

+

-

+

EPL (10 $\mu$ mol/l)

-

-

+

+

**d**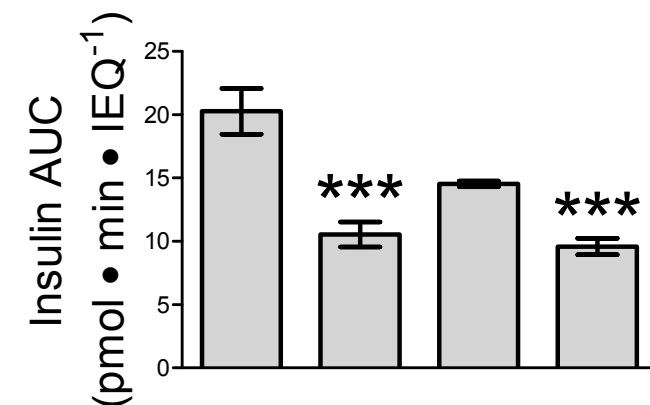

Aldo (1000nmol/l)

-

+

-

+

SPL (1 $\mu$ mol/l)

-

-

+

+
