# Supplementary material
Source: PubMed Central journal article supplement (PMC3216479)

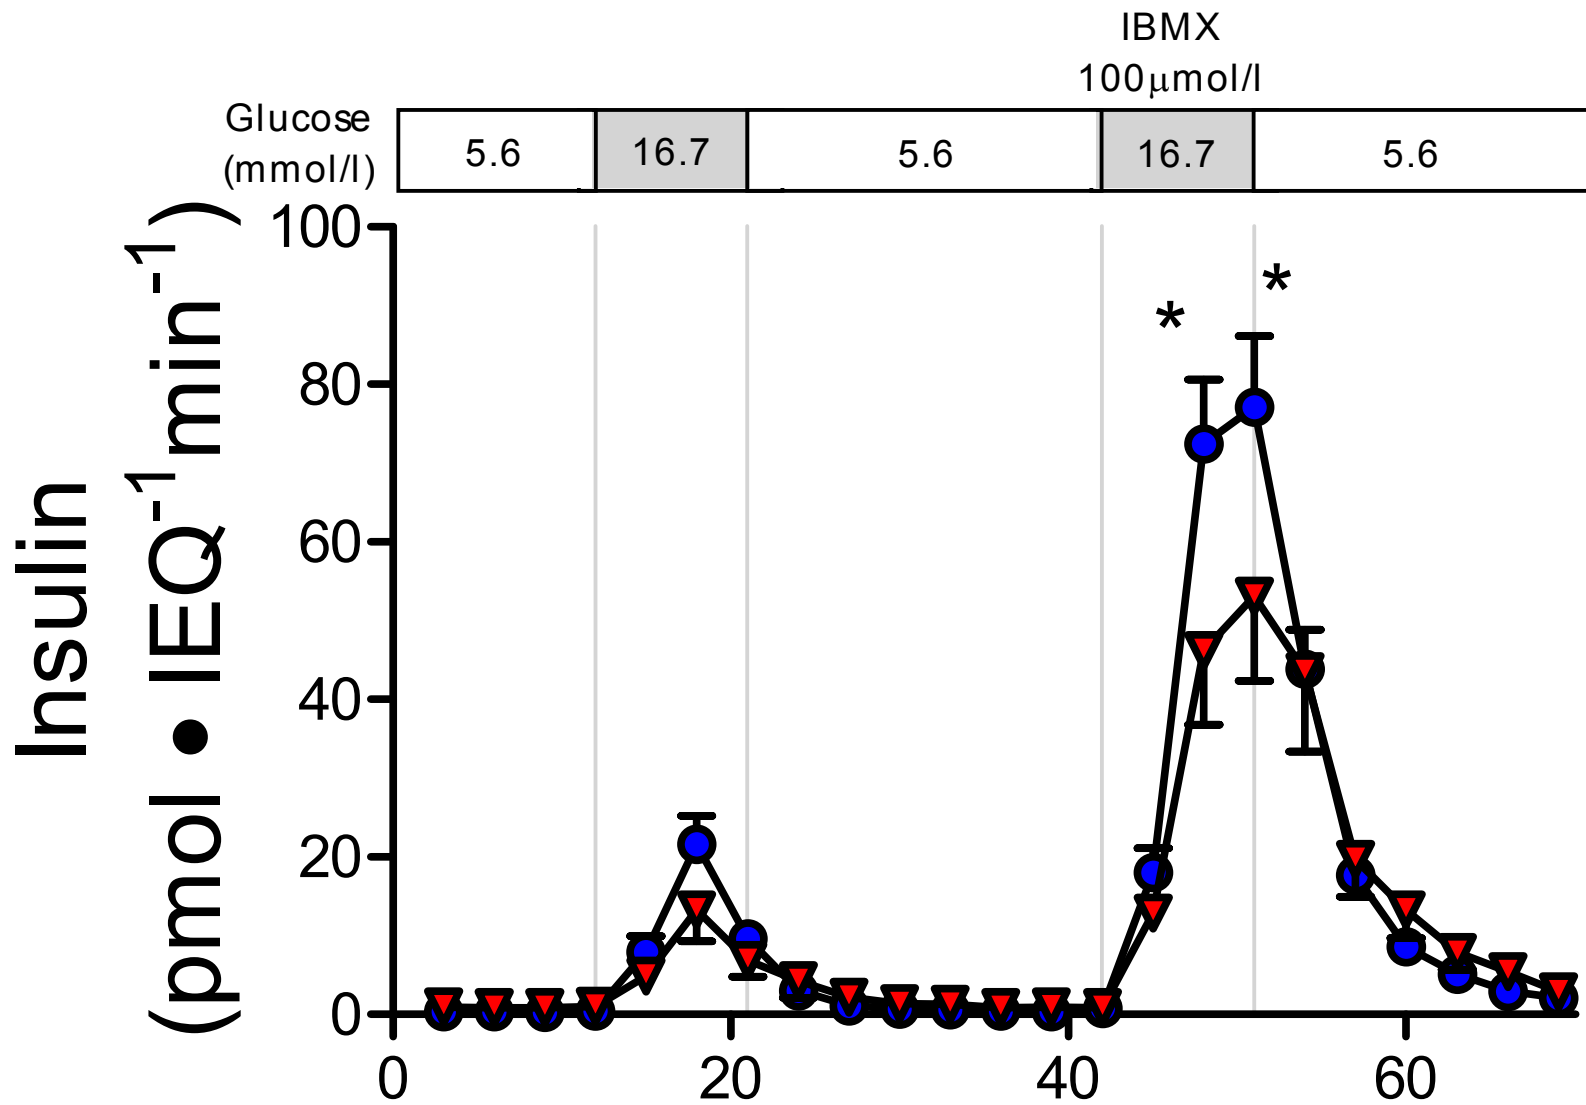

Supplement: NIHMS303225-supplement-3.pdf [file NIHMS303225-supplement-3.pdf]

MR

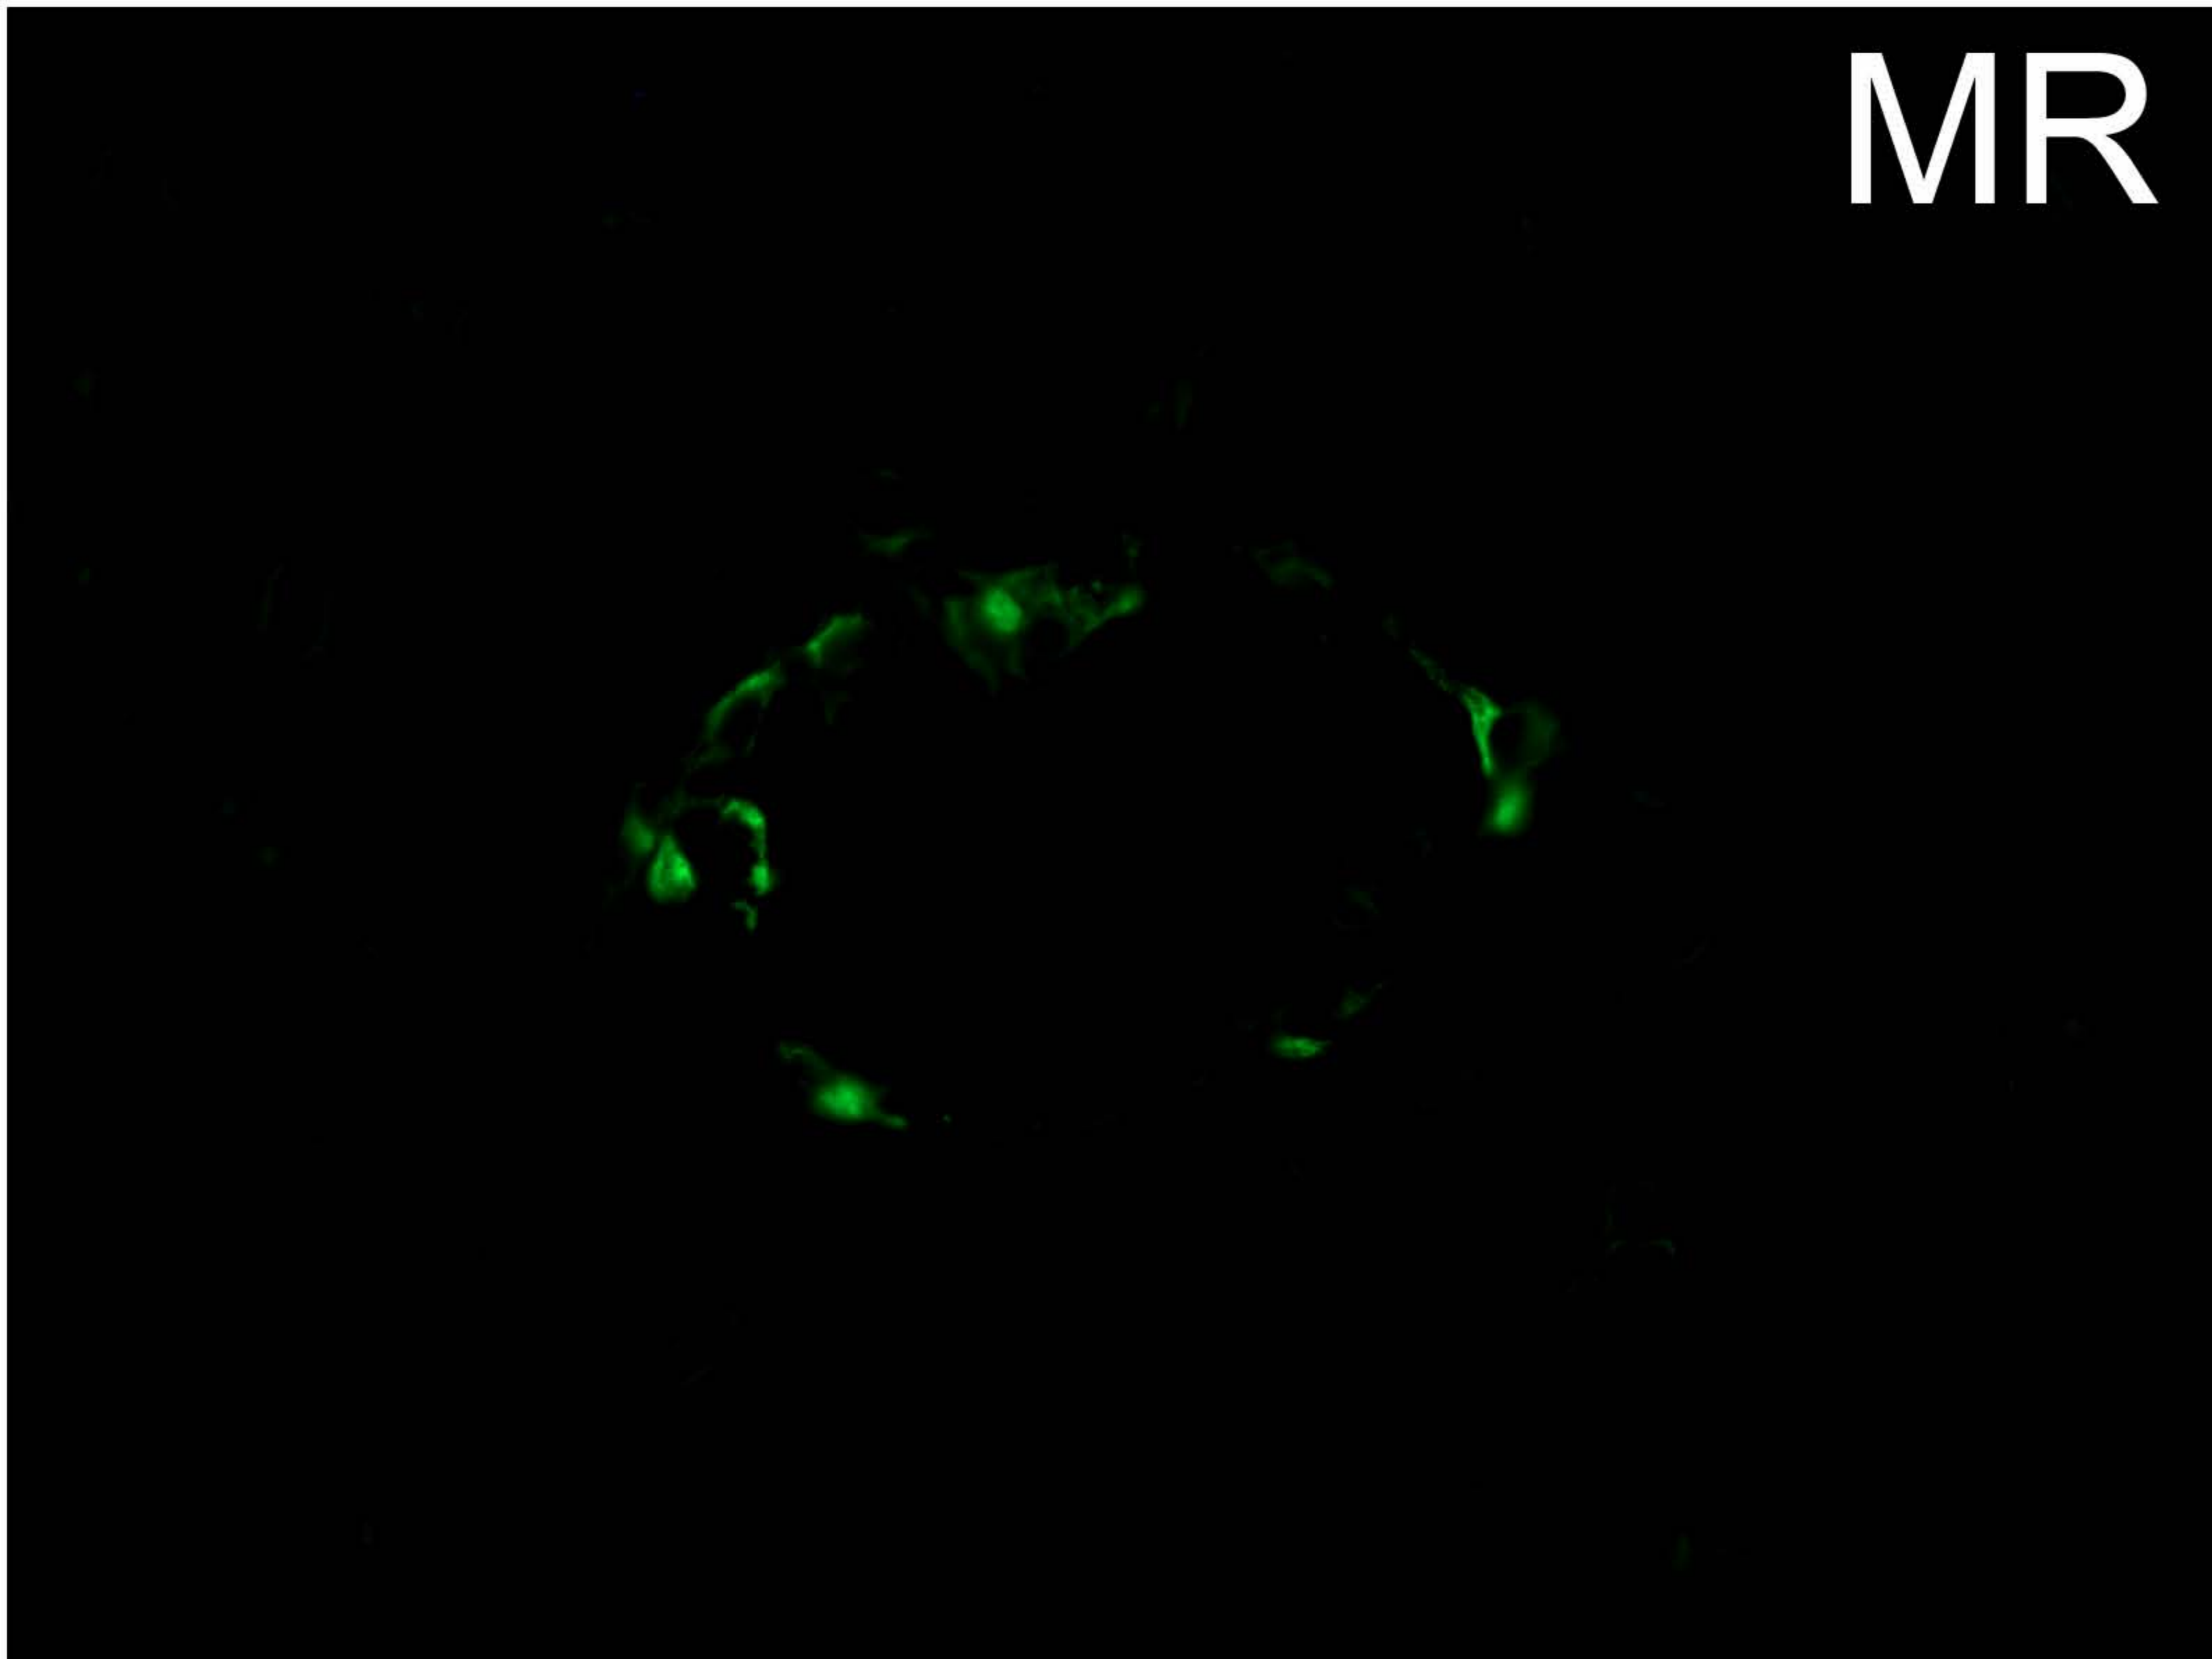

CD31

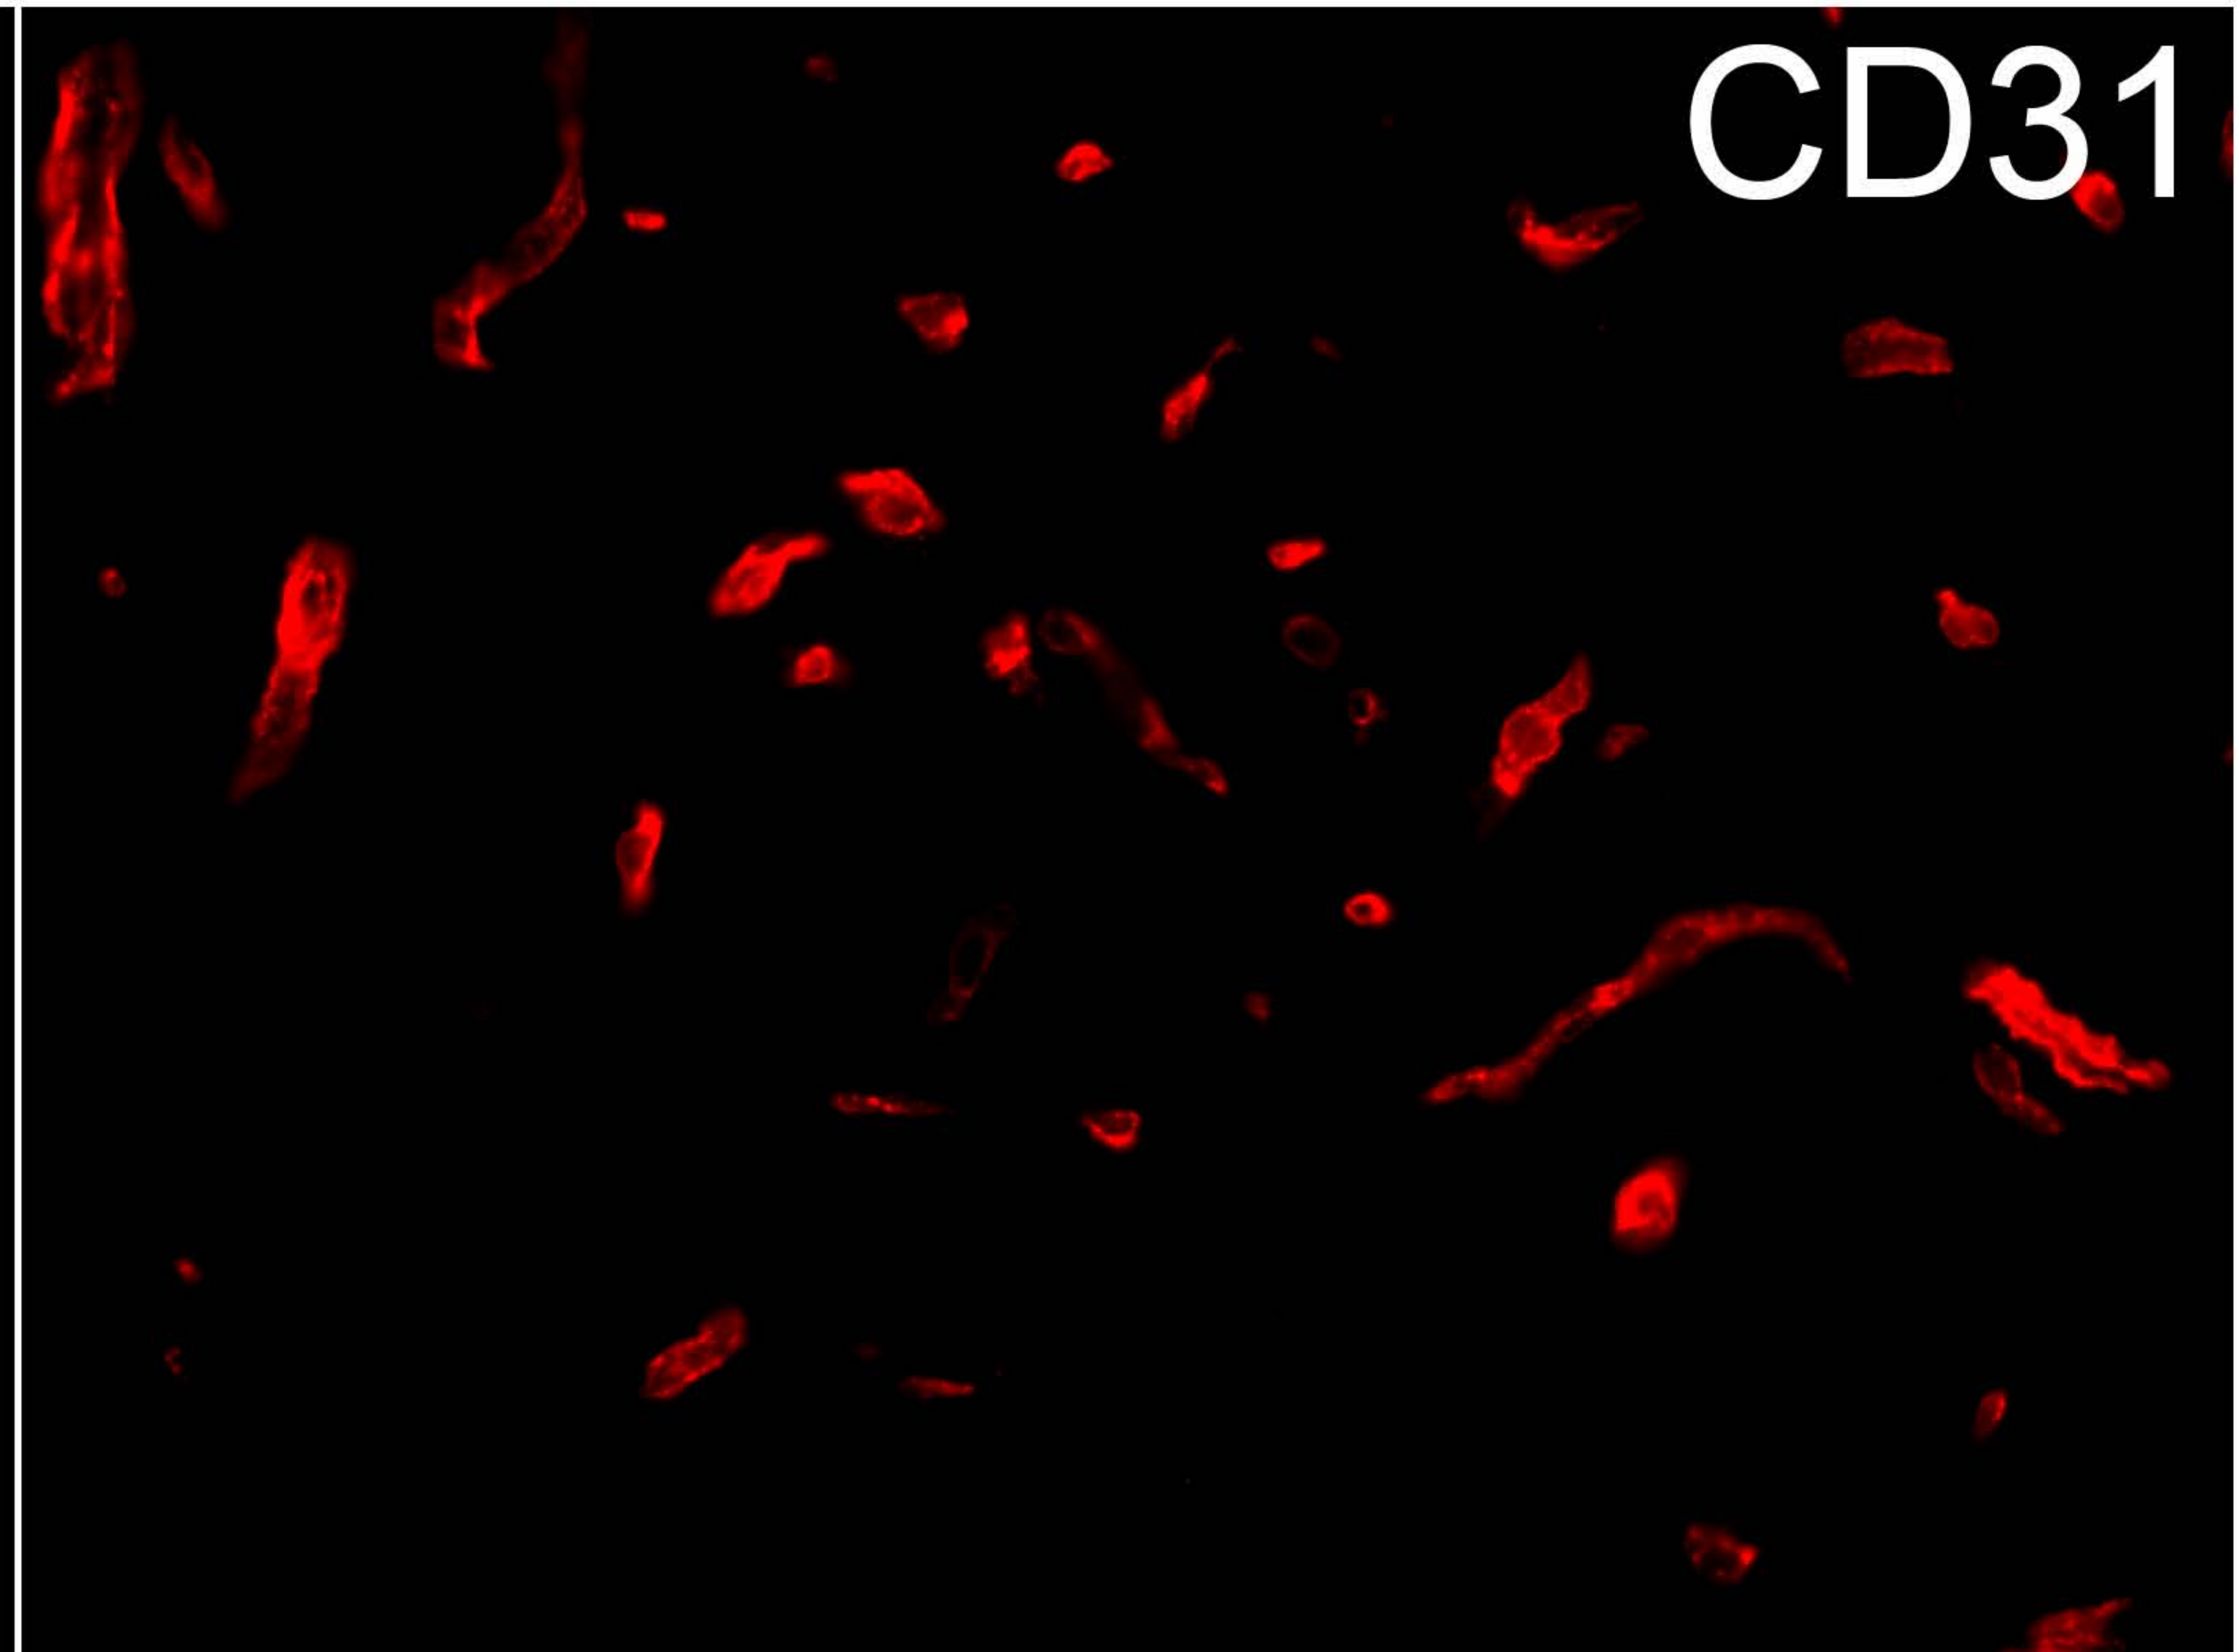

DAPI

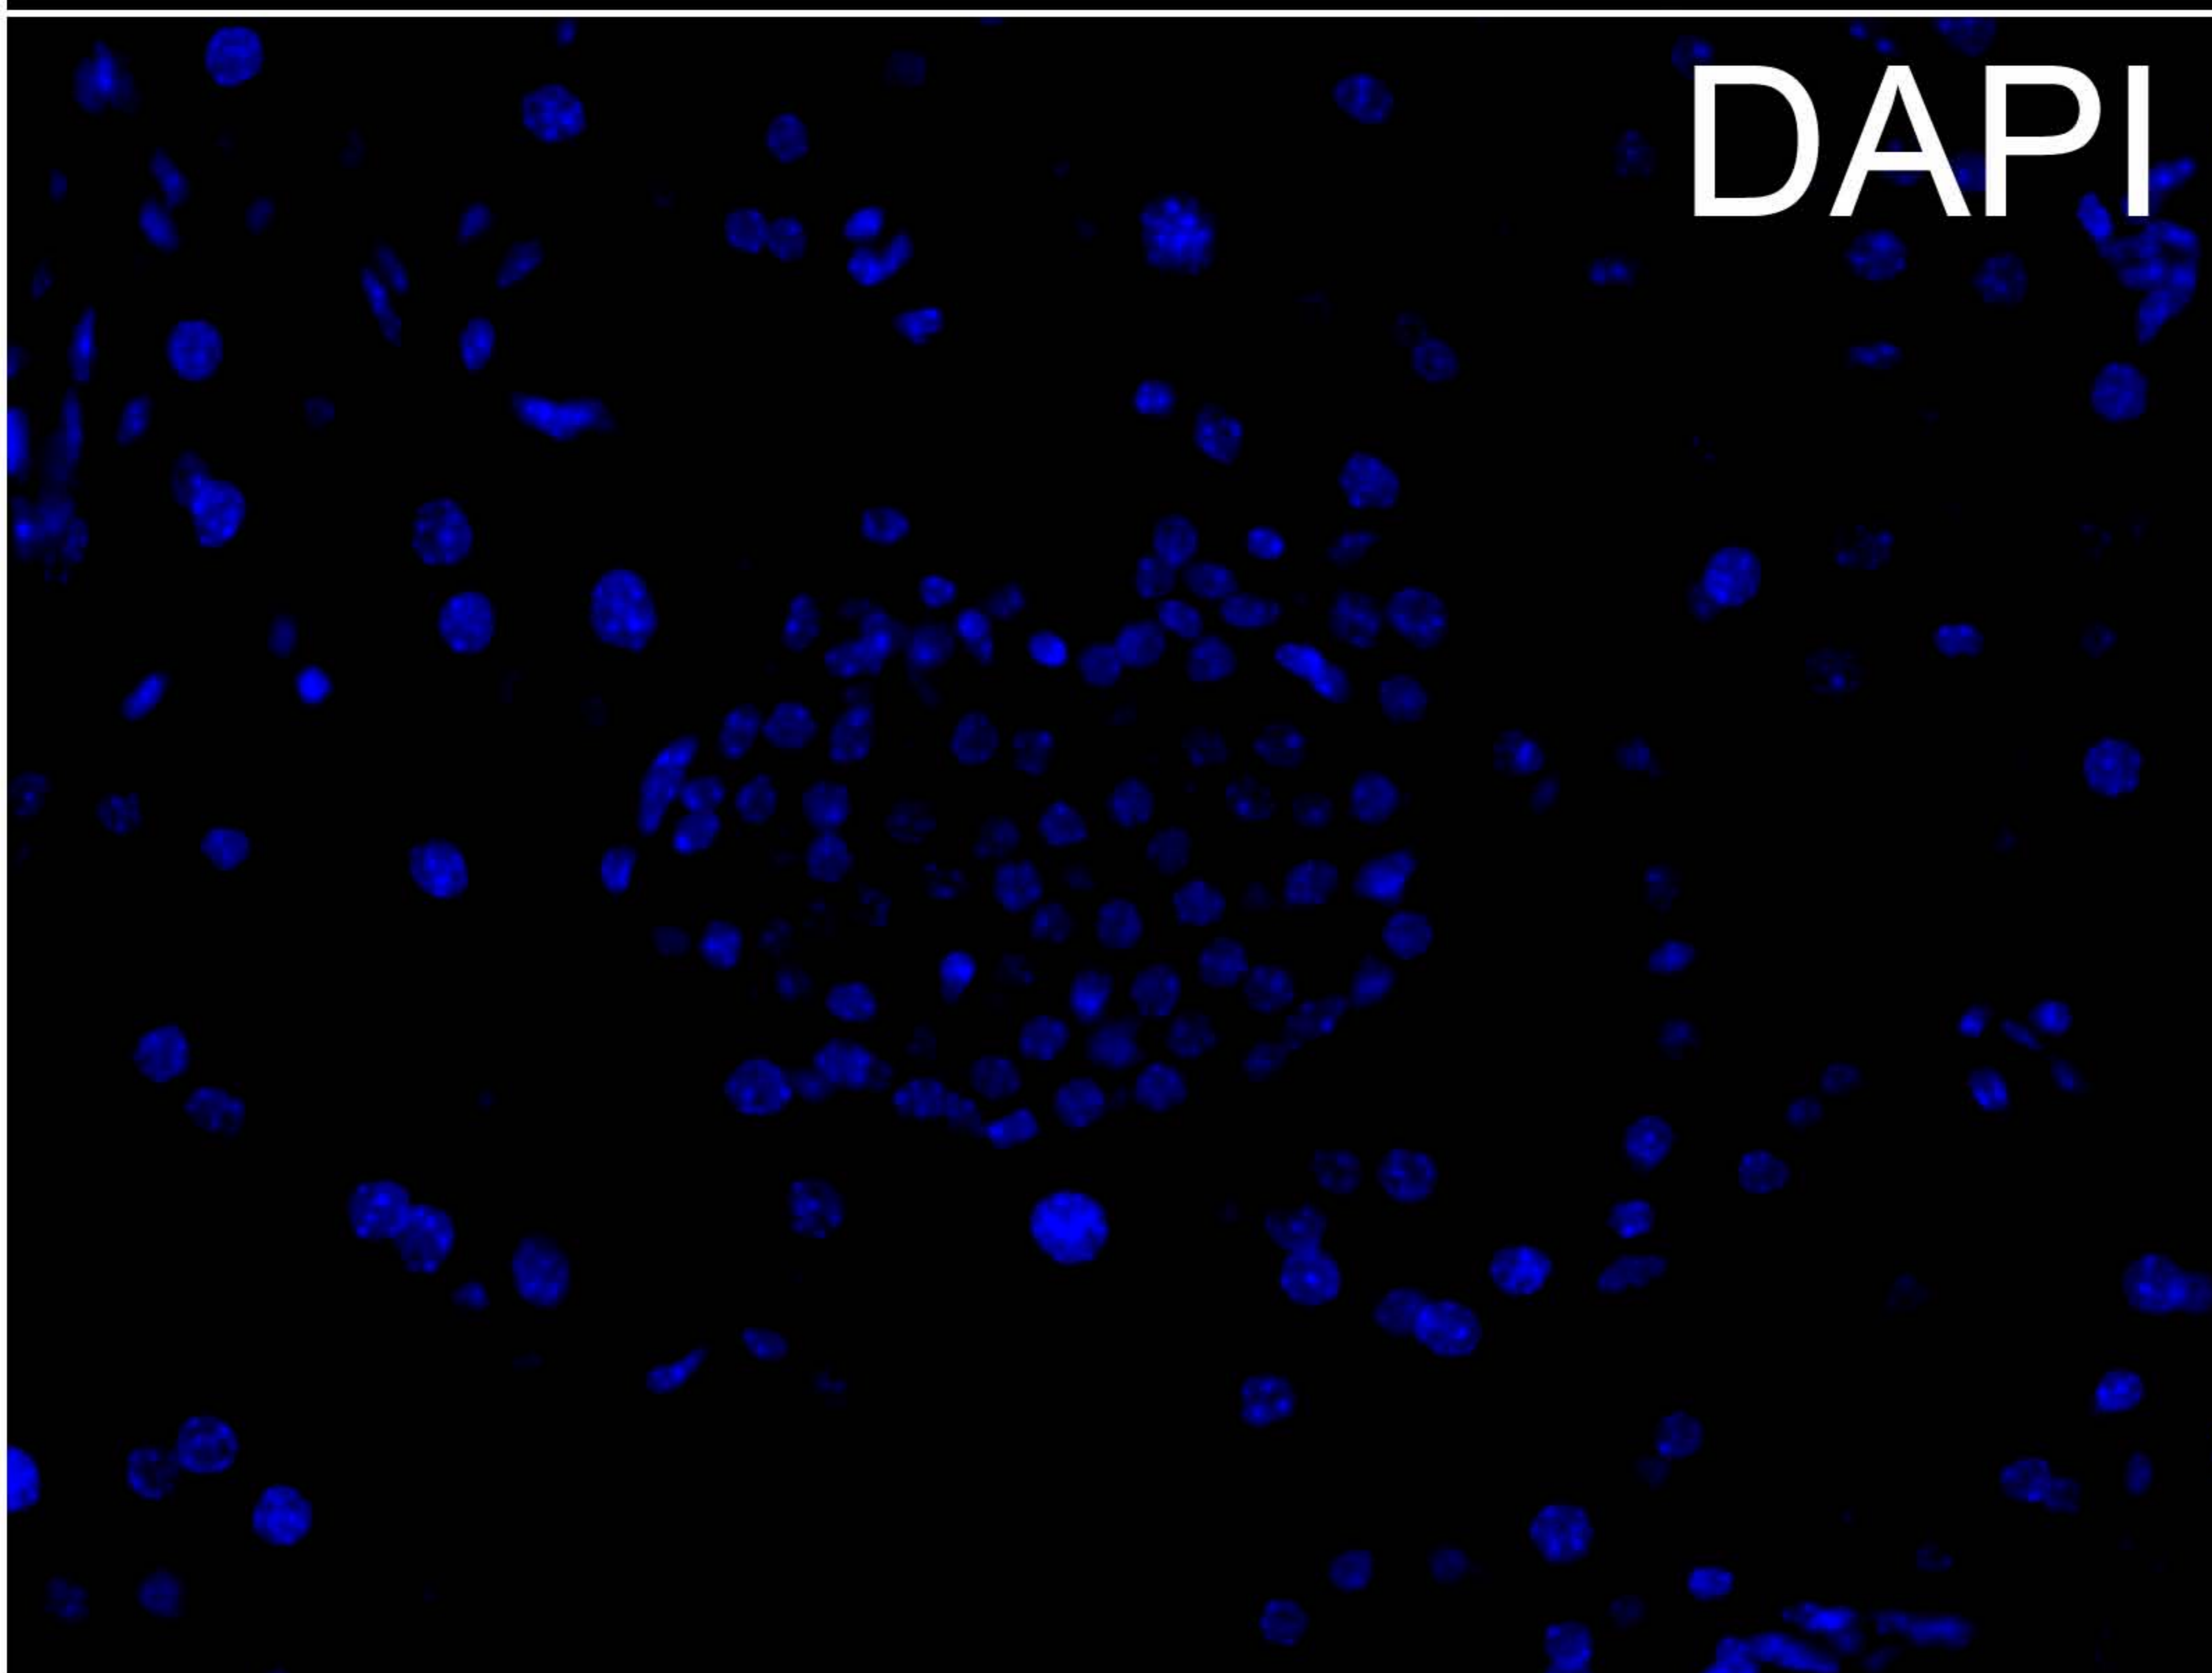

Merge

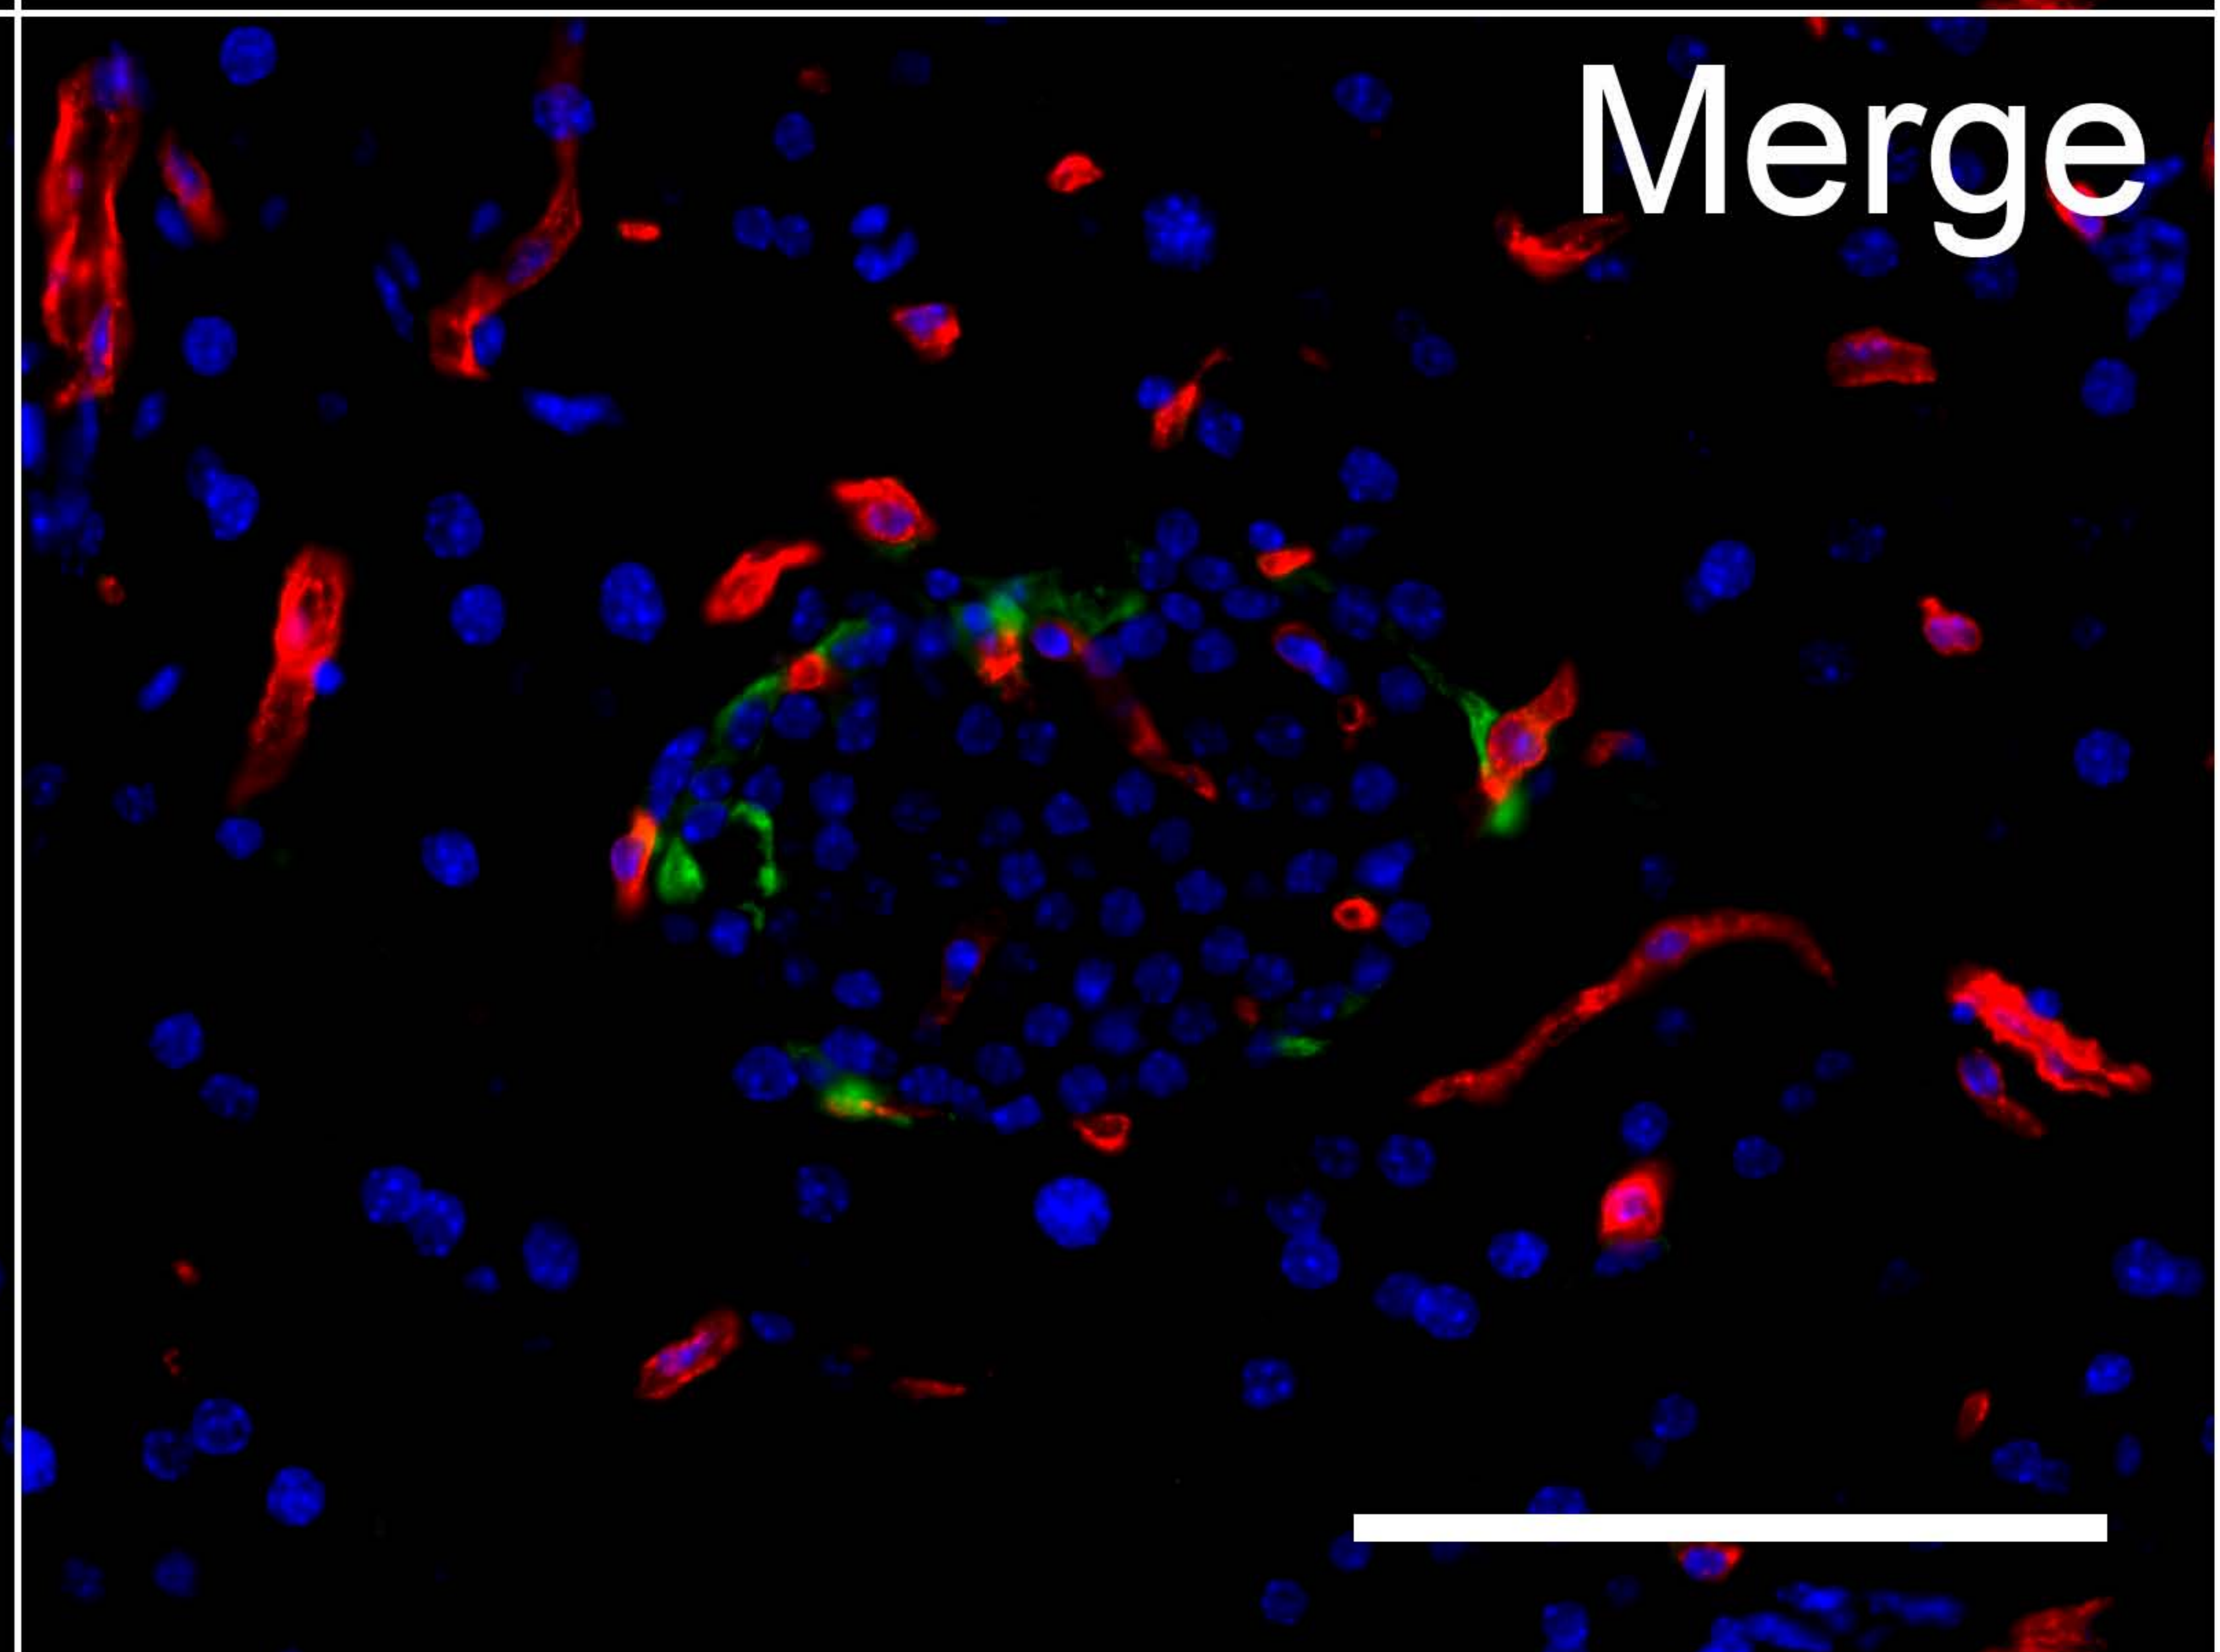

Supplement: NIHMS303225-supplement-5.pdf [file NIHMS303225-supplement-5.pdf]
